# Supplementary material for: Hirsutella sinensis mycelium attenuates bleomycin-induced pulmonary inflammation and fibrosis in vivo
Source: PubMed Central journal article supplement (PMC4620496; doi:10.1038/srep15282), 2015-10-26
Supplement: srep15282-s1.pdf [file srep15282-s1.pdf]

1 **Supplementary Material**

2

3 ***Hirsutella sinensis* mycelium attenuates bleomycin-induced**  
4 **pulmonary inflammation and fibrosis *in vivo***

5

6 Tsung-Teng Huang<sup>1,2,3</sup>, Hsin-Chih Lai<sup>1,2</sup>, Yun-Fei Ko<sup>4,5</sup>, David M. Ojcius<sup>1,6</sup>, Ying-Wei  
7 Lan<sup>7</sup>, Jan Martel<sup>1,3</sup>, John D. Young<sup>1,3,4,5,8\*</sup>, Kowit-Yu Chong<sup>2,7,9\*</sup>

8

9 <sup>1</sup>Center for Molecular and Clinical Immunology, College of Medicine, Chang Gung  
10 University, Taoyuan 33302, Taiwan, ROC, <sup>2</sup>Department of Medical Biotechnology  
11 and Laboratory Science, College of Medicine, Chang Gung University, Taoyuan  
12 33302, Taiwan, ROC, <sup>3</sup>Laboratory of Nanomaterials, College of Medicine, Chang  
13 Gung University, Taoyuan 33302, Taiwan, ROC, <sup>4</sup>Biochemical Engineering Research  
14 Center, Ming Chi University of Technology, New Taipei City 24301, Taiwan, ROC,  
15 <sup>5</sup>Chang Gung Biotechnology Corporation, Taipei 10508, Taiwan, ROC, <sup>6</sup>Department  
16 of Biomedical Sciences, University of the Pacific, Arthur Dugoni School of Dentistry,  
17 San Francisco, CA 94103, USA, <sup>7</sup>Graduate Institute of Biomedical Sciences, Division  
18 of Biotechnology, College of Medicine, Chang Gung University, Taoyuan 33302,  
19 Taiwan, ROC, <sup>8</sup>Laboratory of Cellular Physiology and Immunology, Rockefeller  
20 University, New York, NY 10021, USA, <sup>9</sup>Department of Family Medicine, Chang  
21 Gung Memorial Hospital-Linkou, Taoyuan 33302, Taiwan, ROC.

22

23 \*Correspondence and requests for materials should be addressed to J.D.Y.

24 (dingeyoung@hotmail.com) or K.-Y.C. (kchong@mail.cgu.edu.tw)

25

26 **Supplementary Figures**

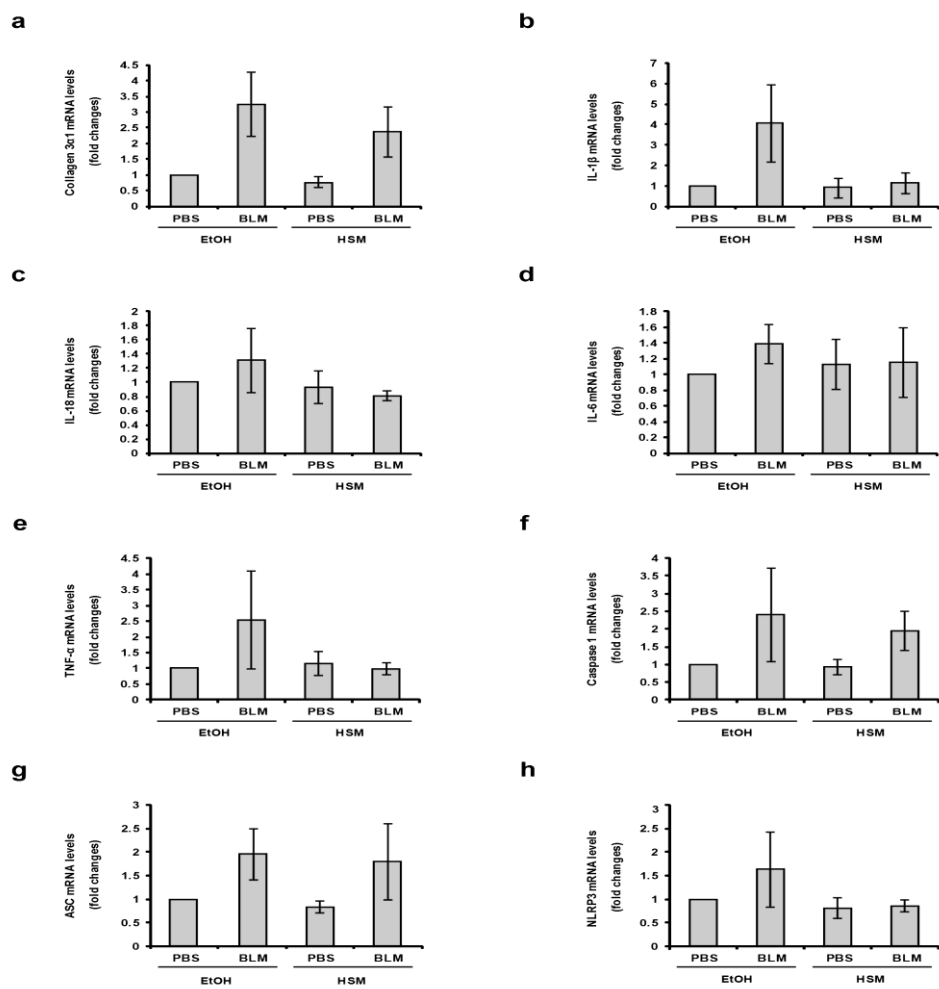

27  
 28 **Figure S1 | Effects of HSM pretreatment on BLM-induced inflammation and**  
 29 **fibrosis-related gene expression in lung tissues on day 7.** Lung tissues were  
 30 subjected to quantitative real-time RT-PCR to detect the effects of HSM on mRNA  
 31 expression of collagen 3 $\alpha$ 1 (a), IL-1 $\beta$  (b), IL-18 (c), IL-6 (d), TNF- $\alpha$  (e), caspase-1 (f),  
 32 ASC (g), and NLRP3 (h). Data are presented as fold change in gene expression  
 33 normalized to  $\beta$ -actin. Results are expressed as means  $\pm$  SEM. The number of mice  
 34 analyzed in each group ranged from 3 to 5.

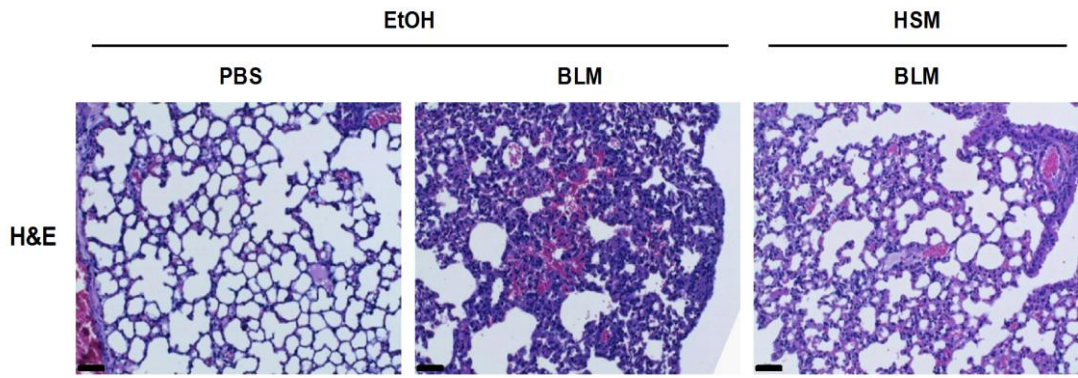

35

36

37 **Figure S2 | Representative histological lung sections of BLM/HSM-treated mice.**

38 Paraffin sections from lung tissues of the mice on day 7 were stained with H&E. Scale

39 bars = 50  $\mu$ m.
